# Supplementary material
Source: Springer Nature journal article supplement (https://www.springermedizin.de/resource/supplementary/12888_2013_1835_MOESM1_ESM.pdf/9481246)

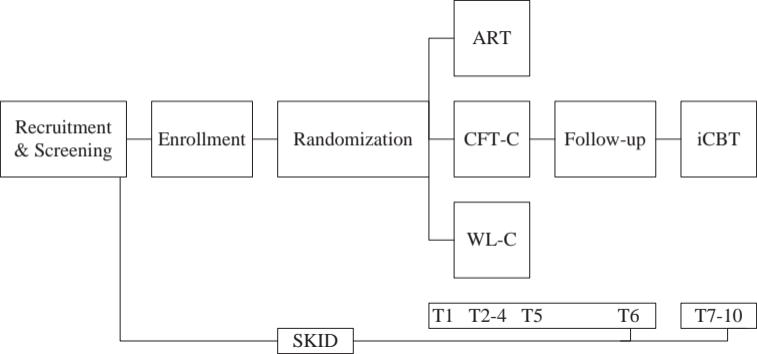

Recruitment  
& Screening

Enrollment

Randomization

ART

CFT-C

Follow-up

iCBT

WL-C

SKID

T1

T2-4

T5

T6

T7-10

Supplement: MOESM1 [file 9481246]
